# Supplementary material for: Neonatal Hepatic Myeloid Progenitors Expand and Propagate Liver Injury in Mice
Source: MDPI journal article supplement (doi:10.3390/jcm12010337), 2023-01-01
Supplement: s1 [file s1]

## Supplementary Material

**Table S1.** Staining panel for mature myeloid cells.

| Antibody           | Clone               | Manufacturer                       | Catalog number |
|--------------------|---------------------|------------------------------------|----------------|
| MHCII              | M5/114.15.2         | eBioscience, Waltham, MA           | 48-5321-82     |
| Cd11b              | M1/70               | eBioscience, Waltham, MA           | 47-0112-82     |
| Cd45               | 30-F11              | eBioscience, Waltham, MA           | 56-0451-82     |
| Ghost              | <i>Not relevant</i> | Tonbo Biosciences, San Diego, CA   | 13-0870-T100   |
| Ly6C               | AL-21               | BD Biosciences, Franklin Lakes, NJ | 563011         |
| Ly6G               | 1A8                 | BD Biosciences, Franklin Lakes, NJ | 560601         |
| Fc Block Cd16/Cd32 | 2.4G2               | BD Biosciences, Franklin Lakes, NJ | 553142         |
| Cd11c              | N418                | Biolegend, San Diego, CA           | 117339         |
| Cd64               | X54-5/7.1           | Biolegend, San Diego, CA           | 139323         |

**Table S2.** Staining panel for hematopoietic stem- and progenitor cells (HSPCs): Long-term hematopoietic stem cells (HSC<sup>LT</sup>), common myeloid progenitors (CMPs), and terminal myeloid progenitors (TMPs).

| Antibody       | Clone   | Manufacturer                       | Catalog number |
|----------------|---------|------------------------------------|----------------|
| c-kit CD117    | 2B8     | Biolegend, San Diego, CA           | 105820         |
| Sca-1 Ly6A/E   | D7      | Biolegend, San Diego, CA           | 108114         |
| FcγR Cd16/Cd32 | 2.4G2   | BD Biosciences, Franklin Lakes, NJ | 553142         |
| LY6C           | HK1.4   | Biolegend, San Diego, CA           | 128012         |
| CSF-1R CD115   | AFS98   | Biolegend, San Diego, CA           | 135506         |
| Flt3 CD135     | A2F10.1 | BD Biosciences, Franklin Lakes, NJ | 560718         |
| CD34           | RAM34   | BD Biosciences, Franklin Lakes, NJ | 553733         |

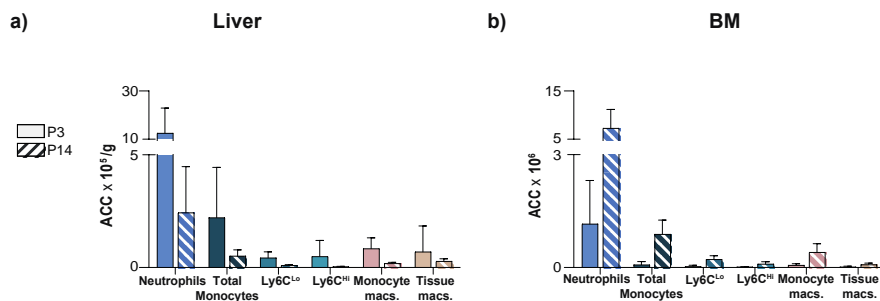

**Supplementary Figure S1.** Mature myeloid populations contract in the liver and expand in the bone marrow of juvenile mice. Quantification of absolute cell count (ACC) of mature myeloid populations on day 3 (P3 n=3) and 14 (P14 n=3) in the (a) liver and (b) bone marrow (BM). Error bars represent mean ± SD. Ly6C<sup>Lo</sup> non-classical monocytes (Ly6C<sup>Lo</sup>), Ly6C<sup>Hi</sup> classical monocytes (Ly6C<sup>Hi</sup>), Macrophages (macs).

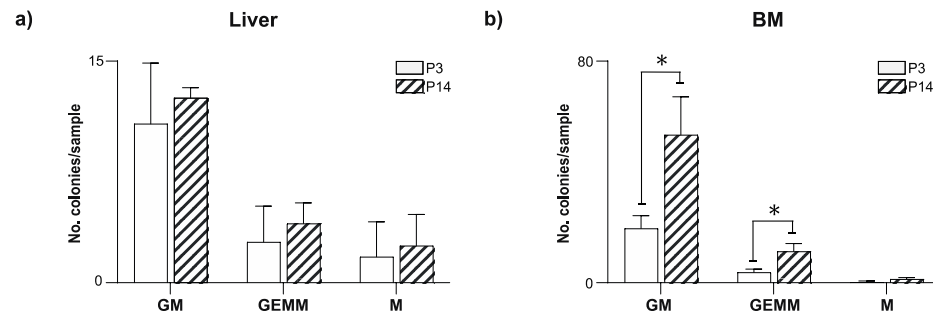

**Supplementary Figure S2.** HSPCs in the livers of juvenile mice maintain myeloid differentiation capacity. Number (no.) myeloid colony forming units form (a) liver and (b) BM at P3 (liver n=8, BM n=5) and P14 (liver n=2, BM n=3). Granulocyte monocyte, GM; granulocyte, erythrocyte, monocyte, megakaryocyte, GEMM; Megakaryocytes, M. p-value < 0.05. Error bars represent the mean  $\pm$  SD.
